# Supplementary material for: Correction: Evidence for the Involvement of Loosely Bound Plastosemiquinones in Superoxide Anion Radical Production in Photosystem II
Source: PubMed Central journal article supplement (PMC4456419; doi:10.1371/journal.pone.0130244), 2015-06-04
Supplement: pone.0130244.s001.pdf [file pone.0130244.s001.pdf]

RESEARCH ARTICLE

# Evidence for the Involvement of Loosely Bound Plastosemiquinones in Superoxide Anion Radical Production in Photosystem II

Deepak Kumar Yadav<sup>1</sup>, Ankush Prasad<sup>1</sup>, Jerzy Kruk<sup>2</sup>, Pavel Pospíšil<sup>1\*</sup>

**1.** Department of Biophysics, Centre of the Region Haná for Biotechnological and Agricultural Research, Faculty of Science, Palacký University, Olomouc, Czech Republic, **2.** Department of Plant Physiology and Biochemistry, Faculty of Biochemistry, Biophysics and Biotechnology, Jagiellonian University, Kraków, Poland

\*[pavel.pospisil@upol.cz](mailto:pavel.pospisil@upol.cz)

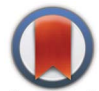

CrossMark  
click for updates

OPEN ACCESS

**Citation:** Yadav DK, Prasad A, Kruk J, Pospíšil P (2014) Evidence for the Involvement of Loosely Bound Plastosemiquinones in Superoxide Anion Radical Production in Photosystem II. PLoS ONE 9(12): e115466. doi:10.1371/journal.pone.0115466

**Editor:** Maya Dimova Lambreva, National Research Council of Italy, Italy

**Received:** September 5, 2014

**Accepted:** November 24, 2014

**Published:** December 26, 2014

**Copyright:** © 2014 Yadav et al. This is an open-access article distributed under the terms of the [Creative Commons Attribution License](https://creativecommons.org/licenses/by/4.0/), which permits unrestricted use, distribution, and reproduction in any medium, provided the original author and source are credited.

**Data Availability:** The authors confirm that all data underlying the findings are fully available without restriction. All relevant data are within the paper.

**Funding:** This work was supported by the Ministry of Education, Youth and Sports of the Czech Republic grants no. LO1204 (National Program of Sustainability I), no. CZ.1.07/2.3.00/20.0057 (Progress and Internationalization of Biophysical Research at the Faculty of Science, Palacký University) and no. CZ.1.07/2.3.00/30.0041 (Support for Building Excellent Research Teams and Intersectoral Mobility at Palacký University). The funders had no role in study design, data collection and analysis, decision to publish, or preparation of the manuscript.

**Competing Interests:** The authors have declared that no competing interests exist.

## Abstract

Recent evidence has indicated the presence of novel plastoquinone-binding sites,  $Q_C$  and  $Q_D$ , in photosystem II (PSII). Here, we investigated the potential involvement of loosely bound plastosemiquinones in superoxide anion radical ( $O_2^-$ ) formation in spinach PSII membranes using electron paramagnetic resonance (EPR) spin-trapping spectroscopy. Illumination of PSII membranes in the presence of the spin trap EMPO (5-(ethoxycarbonyl)-5-methyl-1-pyrroline N-oxide) resulted in the formation of  $O_2^-$ , which was monitored by the appearance of EMPO-OOH adduct EPR signal. Addition of exogenous short-chain plastoquinone to PSII membranes markedly enhanced the EMPO-OOH adduct EPR signal. Both in the unsupplemented and plastoquinone-supplemented PSII membranes, the EMPO-OOH adduct EPR signal was suppressed by 50% when the urea-type herbicide DCMU (3-(3,4-dichlorophenyl)-1,1-dimethylurea) was bound at the  $Q_B$  site. However, the EMPO-OOH adduct EPR signal was enhanced by binding of the phenolic-type herbicide dinoseb (2,4-dinitro-6-sec-butylphenol) at the  $Q_D$  site. Both in the unsupplemented and plastoquinone-supplemented PSII membranes, DCMU and dinoseb inhibited photoreduction of the high-potential form of cytochrome  $b_{559}$  (cyt  $b_{559}$ ). Based on these results, we propose that  $O_2^-$  is formed via the reduction of molecular oxygen by plastosemiquinones formed through one-electron reduction of plastoquinone at the  $Q_B$  site and one-electron oxidation of plastoquinol by cyt  $b_{559}$  at the  $Q_C$  site. On the contrary, the involvement of a plastosemiquinone formed via the one-electron oxidation of plastoquinol by cyt  $b_{559}$  at the  $Q_D$  site seems to be ambiguous. In spite of the fact that the existence of  $Q_C$  and  $Q_D$  sites is not generally

accepted yet, the present study provided more spectroscopic data on the potential functional role of these new plastoquinone-binding sites.

## Introduction

Photosystem (PSII) is a heterodimeric multiprotein-pigment complex embedded in the thylakoid membrane of photosynthetic organisms such as cyanobacteria, algae and higher plants. Recent X-ray crystallographic structural analyses of PSII from the cyanobacteria *Thermosynechococcus elongatus* and *Thermosynechococcus vulcanus* demonstrated that PSII consists of 20 protein subunits, 35 chlorophylls, 12 carotenoids and 25 lipids per monomer [1–3]. During oxygenic photosynthesis, PSII functions as a water-plastoquinone oxidoreductase that oxidizes water to molecular oxygen and reduces plastoquinone to plastoquinol [4–5]. In these reactions, four electrons extracted from water by a water-splitting manganese complex on the electron donor side of PSII are transferred to the primary and secondary electron acceptors on the electron acceptor side of PSII [6–9]. It is well established that the primary and secondary electron acceptors are plastoquinones tightly and loosely bound to the  $Q_A$  and  $Q_B$  sites, respectively. One-electron reduction of plastoquinone at the  $Q_B$  site forms plastosemiquinone ( $Q_B^-$ ), which is subsequently stabilized by the protonation of proximal amino acid side chains ( $Q_BH$ ), whereas the sequential one-electron reduction and protonation of  $Q_BH$  forms plastoquinol ( $Q_BH_2$ ).

Several biochemical studies have suggested that PSII contains two plastoquinone-binding sites in addition to the  $Q_A$  and  $Q_B$  sites [10–12]. Based on the study on photoreduction of cytochrome  $b_{559}$  (cyt  $b_{559}$ ) in the presence of exogenous plastoquinone, a third plastoquinone-binding site referred to as  $Q_C$  was proposed to be located close to cyt  $b_{559}$  [10]. Later, the effects of herbicides and ADRY agents on the redox properties of cyt  $b_{559}$  provided more biochemical data on the existence of  $Q_C$  site [11–12]. Consistent with biochemical studies, the crystal structure of PSII at 2.9 Å resolution revealed the existence of  $Q_C$  site [2]. However, the  $Q_C$  site was not reported in the most recent PSII crystal structure at 1.9 Å resolution [3]. Hasegawa and Noguchi proposed that the affinity of plastoquinone to the  $Q_C$  site is lower compared to the  $Q_B$  site [13]. In agreement with this proposal, it has been recently suggested that ambiguity in the existence of  $Q_C$  site might be due to the different purification and crystallization procedures [14]. Recently, Kaminskaya and Shuvalov [15] identified a fourth plastoquinone-binding site denoted as  $Q_D$ . The authors concluded that the  $Q_C$  site depicted in the PSII crystal structure is in a highly hydrophobic environment, while the  $Q_D$  site is located in a more polar environment. The urea-type herbicide DCMU (3-(3,4-dichlorophenyl)-1,1-dimethylurea) blocks  $Q_B$  to  $Q_B^-$  reduction at the  $Q_B$  site, whereas the phenolic-type herbicide dinoseb (2,4-dinitro-6-sec-butylphenol)

prevents the oxidation of plastoquinol ( $Q_DH_2$ ) to plastosemiquinone ( $Q_DH$ ) by cyt  $b_{559}$  at the  $Q_D$  site [15].

The limitations on electron transport both on the electron donor and acceptor sides of PSII are associated with the formation of reactive oxygen species (ROS) [16–19]. Under high-light conditions, when light absorption by chlorophylls exceeds the utilization of excitation energy, the over-reduction of the electron acceptor side of PSII leads to leakage of electrons to molecular oxygen. The reduction of molecular oxygen results in the formation of superoxide anion radical ( $O_2^-$ ), which either spontaneously dismutates to hydrogen peroxide ( $H_2O_2$ ) or forms bound peroxide through interactions with the non-heme [20] or heme iron in cyt  $b_{559}$  [21]. Subsequent reductions of either  $H_2O_2$  by free metals or bound peroxide by the non-heme iron forms hydroxyl radicals (HO) [20].

Several studies have demonstrated that various cofactors on the electron acceptor side of PSII can reduce molecular oxygen, forming  $O_2^-$ . These cofactors are highly reducing species with a midpoint redox potential lower than the standard redox potential of the  $O_2/O_2^-$  redox couple ( $E_0' = -160$  mV, pH 7). Molecular oxygen may be reduced by pheophytin ( $Pheo^-$ ) [20, 22], the tightly bound plastosemiquinone at the  $Q_A$  site ( $Q_A^-$ ) [23], the loosely bound plastosemiquinone at the  $Q_B$  site ( $Q_B^-$ ) [24], free plastosemiquinone ( $PQ^-$ ) [25] and the ferrous heme iron in the low-potential (LP) form of cyt  $b_{559}$  [26].

Due to a highly negative redox potential ( $E_m$  ( $Pheo/Pheo^-$ ) =  $-505$  to  $-610$  mV, pH 6.5 to 7) [27–28], the reduction of molecular oxygen by  $Pheo^-$  is likely. The favorable thermodynamic properties for reduction of molecular oxygen by  $Pheo^-$  are limited by kinetic restrictions. Forward electron transport from  $Pheo^-$  to  $Q_A^-$  is much more rapid than diffusion-limited reduction of molecular oxygen; thus, the reduction of molecular oxygen by  $Pheo^-$  is less likely. However, under certain circumstances, such as limitation of electron transport from  $Pheo^-$  to  $Q_A^-$ , the  $Pheo^-$  lifetime is prolonged, and the reduction of molecular oxygen is more likely.

In contrast to  $Pheo^-$ , reduction of molecular oxygen by  $Q_A^-$  and  $Q_B^-$  is less favorable from a thermodynamic perspective. In principle, the midpoint redox potentials of the  $Q_A/Q_A^-$  ( $E_m = -60$  to  $-140$  mV, pH 7) [29–30] and  $Q_B/Q_B^-$  ( $E_m = -45$  mV, pH 7) [31] redox couples are greater than the standard redox potential of the  $O_2/O_2^-$  redox couple ( $E_0' = -160$  mV, pH 7) [32]. When the concentrations of reactant ( $O_2 \sim$  hundreds  $\mu$ M) and product ( $O_2^- \sim$  hundreds nM) differ, the operational redox potential of the  $O_2/O_2^-$  redox couple is shifted to 0 mV or even positive values based on the Nernst equation [16–17]. Thus, the reduction of molecular oxygen by  $Q_A^-$  and  $Q_B^-$  seems to be more thermodynamically feasible. From a kinetic perspective, the lifetimes of  $Q_A^-$  and  $Q_B^-$  are sufficiently long for the diffusion-limited reduction of molecular oxygen. In addition to  $Q_A^-$  and  $Q_B^-$ , free  $PQ^-$  can reduce molecular oxygen ( $E_m = -170$  mV, pH 7) [31]; however, the probability of its formation by the interaction of free plastoquinone and free plastoquinol is very low [25]. It has been proposed that the reduction of molecular oxygen by ferrous heme iron in the LP form of cyt  $b_{559}$  produces  $O_2^-$  and may be thermodynamically feasible because

the LP form of cyt  $b_{559}$  has a low midpoint redox potential ( $E_m = -40$  to  $+80$  mV, pH 7) [21, 26, 33].

Herein, we studied whether loosely bound plastosemiquinones are involved in the light-induced  $O_2^-$  formation in PSII membranes using an electron paramagnetic resonance (EPR) spin-trapping spectroscopy. We provide evidence that  $O_2^-$  is produced via one-electron reduction of molecular oxygen by plastosemiquinones, which are formed through one-electron reduction of plastoquinone at the  $Q_B$  site ( $Q_B^-$ ) and one-electron oxidation of plastoquinol by cyt  $b_{559}$  at the  $Q_C$  site ( $Q_CH$ ). By contrast, a role of plastosemiquinone formed at the  $Q_D$  site ( $Q_DH$ ) in  $O_2^-$  formation is ambiguous.

## Materials and Methods

### 1. PSII membrane preparation

PSII membranes were isolated from fresh spinach leaves using the method reported previously by Berthold *et al.* [34] with modifications described by Ford and Evans [35]. The isolated PSII membranes were dissolved in a buffer solution containing 400 mM sucrose, 10 mM NaCl, 5 mM  $CaCl_2$ , 5 mM  $MgCl_2$  and 50 mM Mes-NaOH (pH 6.5) and stored at  $-80^\circ C$  until further use. For PQ-supplemented PSII membranes, exogenous short-chain plastoquinone containing one isoprenoid units in the side-chain (PQ-1) was added to the PSII membranes prior to illumination. 30  $\mu M$  PQ-1 was added to the PSII membranes as an ethanol solution (the final concentration of ethanol did not exceed 1%).

### 2. EPR spin-trapping spectroscopy

$O_2^-$  was detected by EPR spin-trapping spectroscopy using EMPO (5-(ethoxycarbonyl)-5-methyl-1-pyrroline N-oxide; Alexis Biochemicals, Lausen, Switzerland) as the spin trap. PSII membranes (150  $\mu g$  Chl  $ml^{-1}$ ) were illuminated with a continuous white light (1000  $\mu mol$  photons  $m^{-2} s^{-1}$ ) in a glass capillary tube (Blaubrand intraMARK, Brand, Germany) with 25 mM EMPO, 100  $\mu M$  Desferal and 40 mM MES buffer (pH 6.5). PSII membranes were illuminated using a halogen lamp with a light guide (Schott KL 1500, Schott AG, Mainz, Germany) at room temperature. The spectra were recorded using an EPR spectrometer Mini Scope MS400 (Magnettech GmbH, Germany). The following EPR conditions were used: microwave power, 10 mW; modulation amplitude, 1 G; modulation frequency, 100 kHz; sweep width, 100 G; and scan rate, 1.62  $G s^{-1}$ . For quantification, intensity of EPR signal was evaluated as the relative height of peak of the first derivative of the EPR absorption spectrum.

### 3. Optical measurements

The redox properties of cyt  $b_{559}$  were studied using an Olis RSM 1000 spectrometer (Olis Inc., Bogart, Georgia, USA). The redox states of cyt  $b_{559}$  in PSII membranes (150  $\mu g$  Chl  $ml^{-1}$ ) were determined based on the changes in the

absorbance at 559 nm upon stepwise additions of 50  $\mu\text{M}$  potassium ferricyanide, 8 mM hydroquinone, 5 mM sodium ascorbate and sodium dithionite in a cuvette at room temperature using the method in Tiwari and Pospíšil [21] with certain modification. The redox forms of cyt  $b_{559}$  in the PSII membranes were determined by subtracting the control from the treatment spectra: for the HP form of cyt  $b_{559}$ , the hydroquinone-reduced spectra were subtracted from the ferricyanide-oxidized cyt  $b_{559}$ ; for the IP form of cyt  $b_{559}$ , the ascorbate-reduced spectra were subtracted from the hydroquinone-reduced cyt  $b_{559}$ ; and for the LP form of cyt  $b_{559}$ , the dithionite-reduced spectra were subtracted from the ascorbate-reduced cyt  $b_{559}$ . In photoreduction measurements, the photoreduced HP form of cyt  $b_{559}$  (PH) was calculated based on the difference between the absorbance spectra measured after illumination for 180 s and the dark-adapted ferricyanide oxidized spectrum and hydroquinone-reduced spectra were subtracted from photoreduced HP form of cyt  $b_{559}$  to get unreduced HP form of cyt  $b_{559}$ . The PSII membranes were illuminated with continuous white light ( $1000 \mu\text{mol photons m}^{-2} \text{s}^{-1}$ ) in the cuvette, which was rotated by  $90^\circ$  at intervals of 15 s.

#### 4. High-pressure liquid chromatography

The loosely bound plastoquinone was measured using the method in Wydrzynski and Inoue [36]. A 1 ml aliquot of the PSII membranes ( $300 \mu\text{g Chl ml}^{-1}$ ) was mixed with 3 ml of heptane and 30  $\mu\text{l}$  of isobutanol, followed by vortexing for 1 h in the dark. The mixture was then centrifuged at  $4000 \times g$  for 10 min. The plastoquinone content in the upper organic layer was determined by HPLC based on the method of Kruk and Karpinski [37].

## Results

### 1. Superoxide anion radical production in unsupplemented PSII membranes

Light-induced  $\text{O}_2^-$  formation in the unsupplemented PSII membranes was measured using EPR spin-trapping spectroscopy. For spin-trapping, we used the spin trap compound EMPO, which reacts with  $\text{O}_2^-$  to form an EMPO-OOH adduct [38]. No EMPO-OOH adduct EPR signal appeared immediately after addition of EMPO to the unsupplemented PSII membranes in the dark (Fig. 1A). Illumination of the unsupplemented PSII membranes in the presence of EMPO resulted in the production of an EMPO-OOH adduct EPR signal (Fig. 1A). To prevent EMPO-OH adduct formation, the strong iron chelator Desferal was used to decrease the level of free iron available to produce HO through the Fenton reaction [26, 39]. Fig. 2B shows the time profile for the EMPO-OOH adduct EPR signal measured for the unsupplemented PSII membranes. These results demonstrate that the illumination of unsupplemented PSII membranes results in the formation of  $\text{O}_2^-$ .

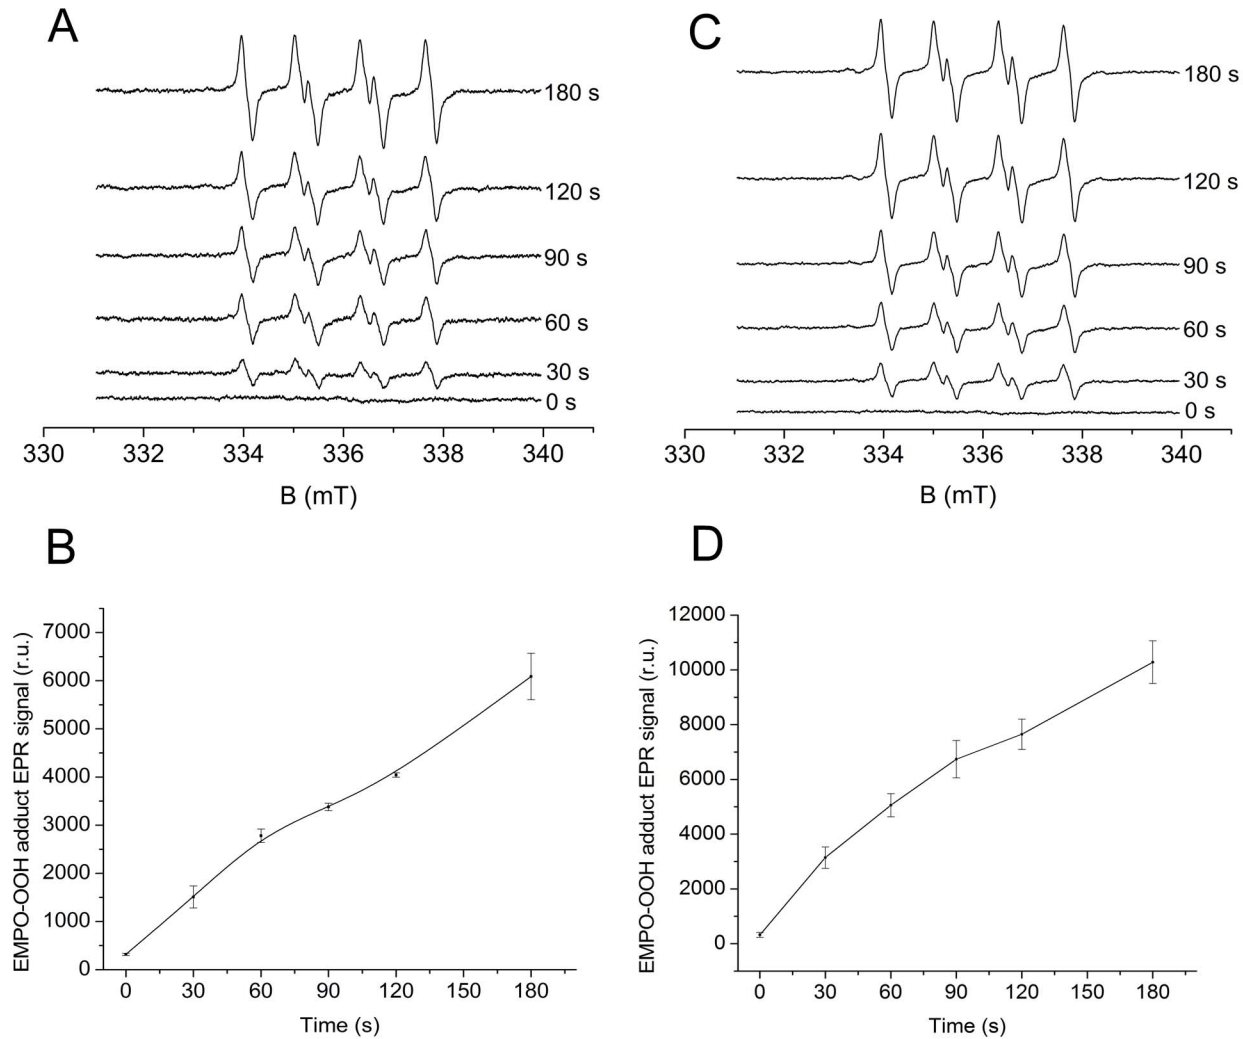

**Fig. 1. Light-induced EMPO-OOH adduct EPR spectra measured using unsupplemented and PQ-supplemented PSII membranes.** EMPO-OOH adduct EPR spectra were obtained after illumination of PSII membranes ( $150 \mu\text{g Chl ml}^{-1}$ ) with white light ( $1000 \mu\text{mol photons m}^{-2} \text{s}^{-1}$ ) in the absence [A, B] and presence of exogenous PQ-1 [C, D] and in the presence of 25 mM EMPO, 100  $\mu\text{M}$  Desferal and 40 mM MES (pH 6.5). Figures B and D shows mean  $\pm$  SD, where  $n=3$ . 30  $\mu\text{M}$  PQ-1 was added to PSII membranes prior to illumination.

doi:10.1371/journal.pone.0115466.g001

## 2. Superoxide anion radical production in PQ-supplemented PSII membranes

To study the role of loosely bound plastosemiquinone in  $\text{O}_2^-$  formation, light-induced  $\text{O}_2^-$  formation was measured in the presence of exogenous PQ-1. Because PQ-1 is smaller than the natural molecule PQ-9, PQ-1 can better penetrate the membrane and substitute for PQ-9 as an electron acceptor in PSII. The observation that the addition of PQ-1 to EMPO did not generate any EPMP-OOH adduct EPR spectrum indicates that PQ-1 does not directly interact with EMPO (data not shown). In the dark, the addition of PQ-1 to the PSII membranes in the presence of EMPO did not produce an EPR signal; however, exposure of PQ-supplemented PSII membranes to white light resulted in the

A

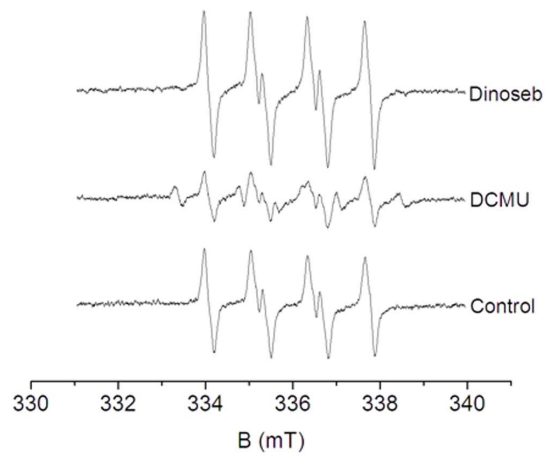

B

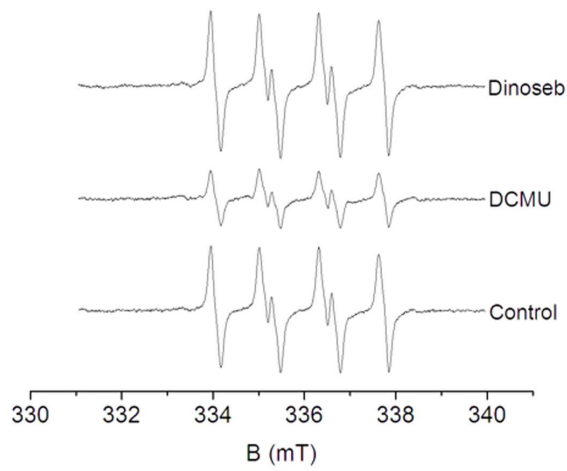

C

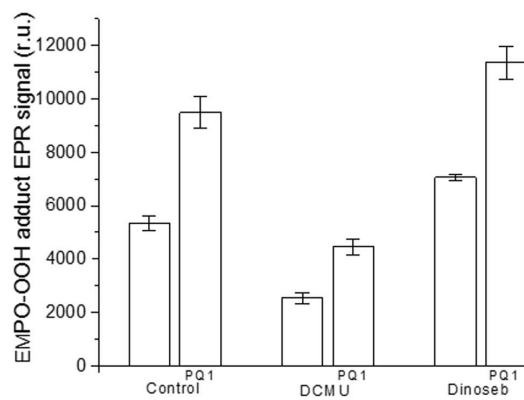

**Fig. 2. The effects of DCMU and dinoseb on EMPO-OOH adduct EPR spectra measured using unsupplemented and PQ-supplemented PSII membranes.** EMPO-OOH adduct EPR spectra were measured using unsupplemented [A] and PQ-supplemented PSII membranes [B] in the presence of DCMU and dinoseb. Prior to illumination, DCMU (20  $\mu$ M) and dinoseb (200  $\mu$ M) were added to the membranes. [C] The relative intensity (mean  $\pm$  SD, n=3) of the light-induced EMPO-OOH adduct EPR signal measured using unsupplemented and PQ-supplemented PSII membranes. The other experimental conditions were the same as described in Fig. 1.

doi:10.1371/journal.pone.0115466.g002

formation of an EMPO-OOH adduct EPR signal (Fig. 1C). The time profile of the EMPO-OOH adduct EPR signal measured after addition of exogenous PQ-1 to the PSII membranes revealed that the intensity of the EMPO-OOH adduct EPR signal was enhanced by 70% as compared to unsupplemented PSII membranes (Fig. 1D). These results indicate that plastosemiquinones are involved in light-induced  $O_2^-$  production in PSII.

### 3. The effects of DCMU and dinoseb on superoxide anion radical production in unsupplemented PSII membranes

To investigate where loosely bound plastosemiquinones involved in  $O_2^-$  production are formed, the effects of two herbicides, DCMU (bound at the  $Q_B$  site) and dinoseb (bound at the  $Q_D$  site) on the EMPO-OOH adduct EPR signal were studied in the unsupplemented PSII membranes. When the unsupplemented PSII membranes were illuminated in the presence of DCMU, the EMPO-OOH adduct EPR signal was suppressed by 50%, whereas the remaining EMPO-OOH EPR signal (50%) was insensitive to DCMU (Fig. 2A and C). In previous studies [24, 26, 40, 41], the relative proportion of DCMU-sensitive and DCMU-insensitive  $O_2^-$  production in PSII varied, likely due to the endogenous plastoquinone content. In addition to the EMPO-OOH adduct EPR signal, the EPR spectrum measured in the presence of DCMU comprises an EMPO-R adduct EPR signal formed by the interaction between EMPO and a carbon-centered radical, the origin of which is unknown. These observations reveal that 1) the DCMU-sensitive EMPO-OOH adduct EPR signal corresponds to  $O_2^-$  formed at or after the  $Q_B$  site (i.e., reduction of molecular oxygen by loosely bound plastosemiquinones formed by one-electron reduction of plastoquinone and one-electron oxidation of plastoquinol) and 2) the DCMU-insensitive EMPO-OOH adduct EPR signal corresponds to  $O_2^-$ , which is formed before the  $Q_B$  site (i.e., reduction of molecular oxygen by Pheo $^-$  and  $Q_A^-$ ). When dinoseb was added to the unsupplemented PSII membranes prior to illumination, the EMPO-OOH adduct EPR signal was enhanced by 25% (Fig. 2A and C). Due to the fact that the occupation of the  $Q_D$  site does not eliminate  $O_2^-$  production, the production of  $O_2^-$  by reduction of molecular oxygen by plastosemiquinone at the  $Q_D$  site is ambiguous.



#### 4. The effects of DCMU and dinoseb on superoxide anion radical production in PQ-supplemented PSII membranes

Addition of DCMU to PQ-supplemented PSII membranes decreased the EMPO-OOH adduct EPR signal by 55% (Fig. 2B and C). Similar to unsupplemented PSII membranes, in PQ-supplemented PSII membranes, 1)  $O_2^-$  is formed at or after the  $Q_B$  site via reduction of molecular oxygen by plastosemiquinone formed via one-electron reduction of plastoquinone and one-electron oxidation of plastoquinone and 2)  $O_2^-$  is formed prior to the  $Q_B$  site by reduction of molecular oxygen by Pheo<sup>-</sup> and  $Q_A^-$ . The intensity of the EMPO-OOH adduct EPR signal after the addition of DCMU was higher for the PQ-supplemented PSII membranes than for the unsupplemented PSII membranes (Fig. 2C). When dinoseb was added to the PQ-supplemented PSII membranes prior to illumination, the EMPO-OOH adduct EPR signal was enhanced by 17% (Fig. 2B and C). The intensity of the EMPO-OOH adduct EPR signal after the addition of dinoseb was higher for PQ-supplemented PSII membranes compared to unsupplemented PSII membranes (Fig. 2C). Similar to the unsupplemented PSII membranes, the effect of dinoseb on  $O_2^-$  production in PQ-supplemented PSII membranes indicate that the  $Q_D$  site is unlikely involved in  $O_2^-$  production.

#### 5. Different redox forms of cyt $b_{559}$ in the unsupplemented and PQ-supplemented PSII membranes

To determine the different redox forms of cyt  $b_{559}$ , we measured changes in absorption at 559 nm in the unsupplemented and PQ-supplemented PSII membranes. The different redox forms of cyt  $b_{559}$  were discerned by examining the hydroquinone-reduced minus ferricyanide-oxidized (HP) spectra, ascorbate-reduced minus hydroquinone-reduced (IP) spectra, and dithionite-reduced minus ascorbate-reduced (LP) spectra. In the unsupplemented PSII membranes, 40% of cyt  $b_{559}$  was in the hydroquinone-reducible HP form, 22% was in the sodium ascorbate-reducible IP form, and 38% was in the dithionite-reducible LP form (Fig. 3A). In the supplemented PSII membranes, the levels of the hydroquinone-reducible HP, sodium ascorbate-reducible IP and dithionite-reducible LP forms of cyt  $b_{559}$  were 42, 12 and 46% (Fig. 3B). These observations confirm the presence of the HP, IP and LP forms of cyt  $b_{559}$  in both unsupplemented and PQ-supplemented PSII membranes.

#### 6. Cyt $b_{559}$ photoreduction in the unsupplemented and PQ-supplemented PSII membranes

To observe the light-induced reducible redox form of cyt  $b_{559}$ , cyt  $b_{559}$  photoreduction was measured in both unsupplemented and PQ-supplemented PSII membranes. When the unsupplemented PSII membranes were exposed to white light, the HP form of cyt  $b_{559}$  was reduced (Fig. 3C). Addition of hydroquinone to the unsupplemented PSII membranes after illumination did not further reduce the HP form of cyt  $b_{559}$ ; however, addition of sodium ascorbate

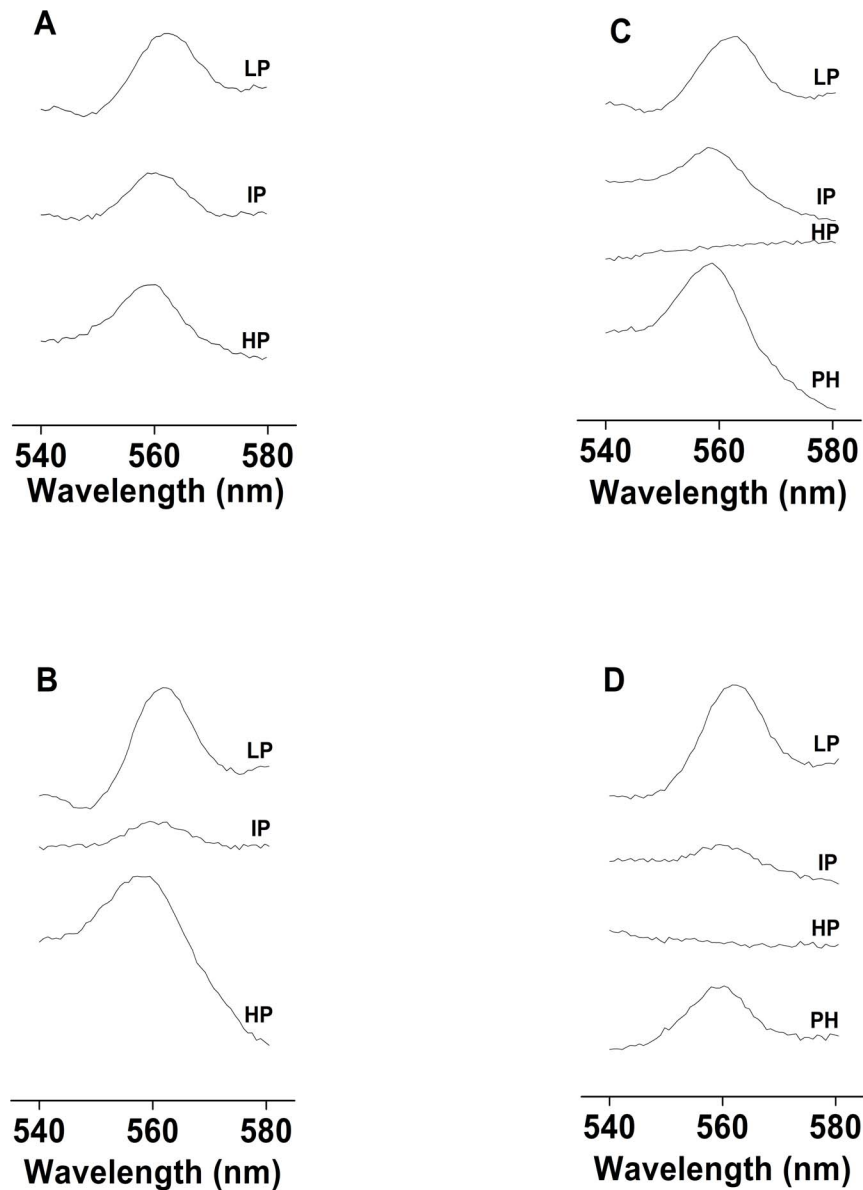

**Fig. 3. Differences in redox spectra and *cyt b<sub>559</sub>* photoreduction measured using unsupplemented and PQ-supplemented PSII membranes.** Differences in the redox spectra of *cyt b<sub>559</sub>* measured in the dark using unsupplemented [A] and PQ-supplemented PSII membranes [B]. 100  $\mu$ M PQ-1 was added to the PSII membranes prior to the experiments. To measure *cyt b<sub>559</sub>* photoreduction, unsupplemented [C] and PQ-supplemented PSII membranes [D] were illuminated for 180 s at high light intensity (1000  $\mu$ mol photons  $m^{-2} s^{-1}$ ). The spectra represent the difference in the light minus ferricyanide-oxidized spectra [the photoreduced HP form of *cyt b<sub>559</sub>*, (PH)], hydroquinone-reduced minus ferricyanide-oxidized or hydroquinone-reduced minus light spectra [HP form of *cyt b<sub>559</sub>*, (HP)], ascorbate-reduced minus hydroquinone-reduced spectra [IP form of *cyt b<sub>559</sub>*, (IP)] and dithionite-reduced minus ascorbate-reduced spectra [LP form of *cyt b<sub>559</sub>*, (LP)].

doi:10.1371/journal.pone.0115466.g003

and sodium dithionite reduced the IP and LP forms of *cyt b<sub>559</sub>* (Fig. 3C). Similarly, exposure of PQ-supplemented PSII membranes to white light reduced the HP form of *cyt b<sub>559</sub>* (Fig. 3D); however, addition of hydroquinone to

PQ-supplemented PSII membranes after illumination did not further reduce the HP form. Addition of ascorbate and dithionite to PQ-supplemented PSII membranes reduced the IP and LP forms of cyt  $b_{559}$  (Fig. 3D). These results demonstrate that illumination of the unsupplemented and PQ-supplemented PSII membranes reduced the HP form of cyt  $b_{559}$ .

### 7. The effects of DCMU and dinoseb on cyt $b_{559}$ photoreduction in the unsupplemented and PQ-supplemented PSII membranes

To confirm the involvement of the  $Q_B$  site in cyt  $b_{559}$  photoreduction via mobile plastoquinol, cyt  $b_{559}$  photoreduction was measured in the presence of DCMU. Addition of DCMU to unsupplemented or PQ-supplemented PSII membranes prior to illumination fully prevented photoreduction of the HP form of cyt  $b_{559}$  (Fig. 4A and 4B). These results indicate that DCMU prevents photoreduction of HP form of cyt  $b_{559}$  due to inhibition of plastoquinol formation. To confirm the involvement of the  $Q_D$  site in the photoreduction of cyt  $b_{559}$ , cyt  $b_{559}$  photoreduction was measured in the presence of dinoseb. Illumination of PSII membranes in the presence of dinoseb did not cause cyt  $b_{559}$  photoreduction in both unsupplemented (Fig. 4C) and PQ-supplemented PSII membranes (Fig. 4D). These results suggest that dinoseb convert HP form to LP form of cyt  $b_{559}$  and prevents reduction of cyt  $b_{559}$  at the  $Q_D$  site due to inhibition of plastoquinol oxidation.

### 8. Quantifying loosely bound PQ and chlorophyll in PSII

To correlate the PQ-binding site and  $O_2^-$  formation in PSII membranes, the content of loosely bound plastoquinone was measured by HPLC. HPLC analysis of the chlorophyll content indicated approximately 250 chlorophyll molecules per reaction center (RC), consistent with values in the literature (i.e., 200–300 Chl/RC) [35, 42]. HPLC analysis of plastoquinone levels demonstrated that two of three plastoquinones per RC were extractable from the PSII membranes. These observations suggest that one plastoquinone is tightly bound ( $Q_A$ ) and two plastoquinones are loosely bound ( $Q_B$  and  $Q_C$  or  $Q_D$ ).

## Discussion

Several lines of evidence have been provided that  $O_2^-$  is formed through one-electron reduction of molecular oxygen on the electron acceptor side of PSII [16, 17]. As the operational redox potential for the  $O_2/O_2^-$  redox couple is close to 0 mV or even positive due to the difference in concentration of molecular oxygen and  $O_2^-$ ,  $O_2^-$  formation requires a suitable electron donor with a redox potential lower than the operational redox potential of  $O_2/O_2^-$  redox couple, and thus consequently, a high reducing power to reduce molecular oxygen. It was suggested that various cofactors on the electron acceptor side of PSII can fulfil such thermodynamic criteria and thus might serve as potential electron donors to

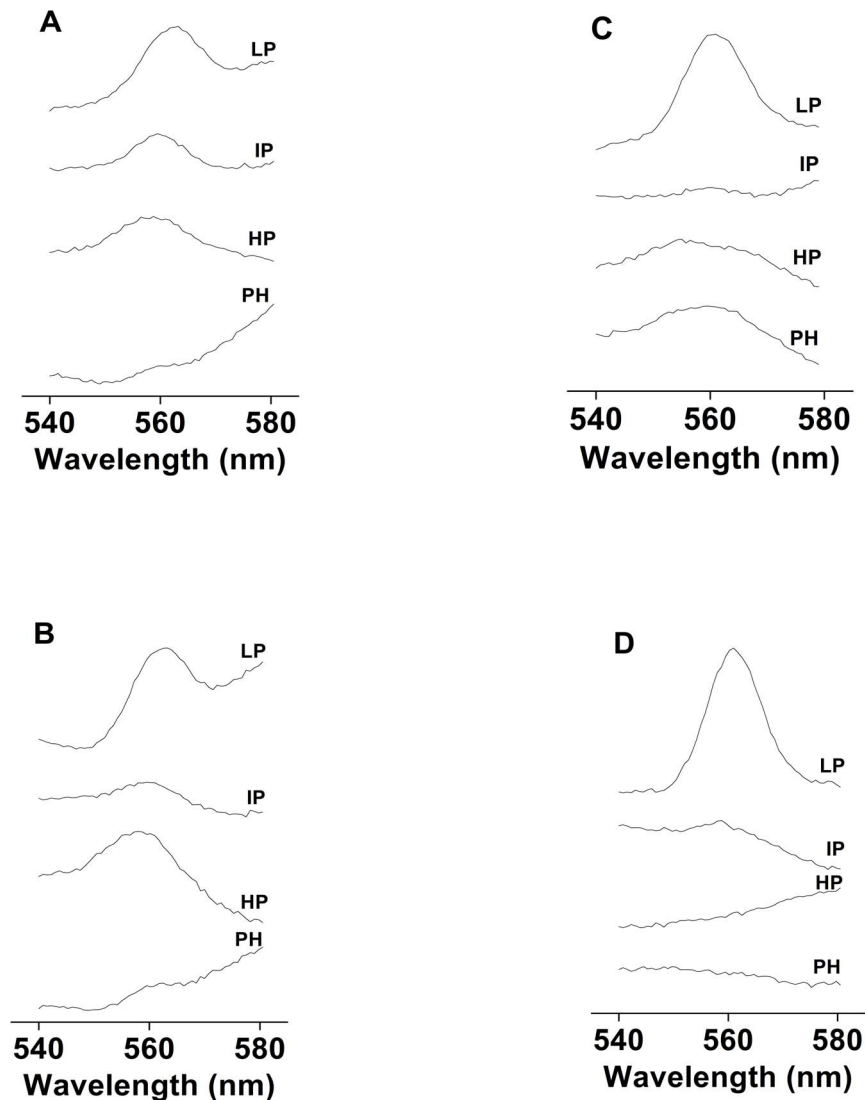

**Fig. 4. The effects of DCMU and dinoseb on *cyt b<sub>559</sub>* photoreduction measured using unsupplemented and PQ-supplemented PSII membranes.** *Cyt b<sub>559</sub>* photoreduction was measured using unsupplemented [A, C] and PQ-supplemented [B, D] PSII membranes in the presence of DCMU [A, B] and dinoseb [C, D]. The other experimental conditions were the same as described in Fig. 3.

doi:10.1371/journal.pone.0115466.g004

molecular oxygen. Although light-induced  $O_2^-$  formation in PSII has been examined by measuring oxygen consumption [43–45], ferricytochrome c reduction and the xanthine/xanthine oxidase assay [22], voltametric methods [23] and EPR spin-trapping spectroscopy [20, 24, 26, 40–41, 46, 47], the molecular mechanism underlying light-induced  $O_2^-$  formation in the PSII membranes supplemented with exogenous PQ-1. Addition of exogenous PQ-1 to the PSII membranes enhanced light-induced  $O_2^-$  production, indicating the involvement of plastosemiquinones

in  $O_2^-$  production. Because the midpoint redox potentials for tightly bound plastosemiquinones at the  $Q_A$  site ( $E_m(Q_A/Q_A^-) = -60$  to  $-140$  mV, pH 7) [29–30] and loosely bound plastosemiquinone at the  $Q_B$  site ( $E_m(Q_B/Q_B^-) = -45$  mV, pH 7) [31] are lower than the operational redox potential of  $O_2/O_2^-$  redox couple (close to 0 mV or even positive), the reduction of molecular oxygen by plastosemiquinones is feasible. Based on the presented data, we propose that  $O_2^-$  is produced by one-electron reduction of molecular oxygen by plastosemiquinones formed by one-electron reduction of plastoquinone at the  $Q_B$  sites and one-electron oxidation of plastoquinol at the  $Q_C$  site but most likely not the  $Q_D$  site (Fig. 5).

### 1. Involvement of the $Q_B$ site in $O_2^-$ production

In the EPR spin-trapping data obtained using the urea-type herbicide DCMU, the EMPO-OOH adduct EPR signal was only partially suppressed, which indicates that molecular oxygen is reduced prior to the  $Q_B$  site (Fig. 2A and B). The DCMU-insensitive EMPO-OOH adduct EPR signal (50%) is likely due to reduction of molecular oxygen by Pheo $^-$  or  $Q_A^-$ . It has been previously proposed that Pheo $^-$  and  $Q_A^-$  function as the predominant electron donors to molecular oxygen due to their low redox potentials [20, 22, 23, 48]. The DCMU-sensitive EMPO-OOH adduct EPR signal (50%) corresponds to the formation of  $O_2^-$  via reduction of molecular oxygen by plastosemiquinone formed at or after the  $Q_B$  site. Electron transfer from  $Q_A^-$  to loosely bound plastoquinone at the  $Q_B$  site yields  $Q_B^-$ , which subsequently forms the more stable  $Q_BH$  by protonation of proximal amino acids. Subsequent  $Q_BH$  reduction and protonation yield  $Q_BH_2$ , which moves out through the channels [11]. However, if protonation of  $Q_B^-$  by proximal amino acids slows, the lifetime of  $Q_B^-$  increases. When molecular oxygen is in the proximity to  $Q_B^-$ , reduction of molecular oxygen by  $Q_B^-$  produces  $O_2^-$ .

### 2. Involvement of the $Q_C$ site in $O_2^-$ production

Based on X-ray crystal structural analyses of the PSII complex,  $Q_BH_2$  exchange by plastoquinone at the  $Q_B$  site was proposed to occur via plastoquinol diffusion through channel I (bottom channel) and II (upper channel) [2]. During this process,  $Q_BH_2$  liberates from the  $Q_B$  site and diffuses through the bottom channel to the  $Q_C$  site located in the vicinity of the heme iron of cyt  $b_{559}$  at distance of 17 Å from the head group of plastoquinol. Plastoquinol binding at the  $Q_C$  site was proposed to favour electron donation to the ferric heme iron of cyt  $b_{559}$  [46]. Illumination of PSII membranes caused the photoreduction of the HP form of cyt  $b_{559}$ , demonstrating that  $Q_CH_2$  is oxidized by the ferric heme iron of cyt  $b_{559}$  to form  $Q_CH$ . Here, we propose that  $Q_CH$  reduces molecular oxygen to  $O_2^-$ . Because addition of dinoseb to the PSII membranes partially enhanced  $O_2^-$  formation (Fig. 2C), we propose that the ferrous heme iron of LP cyt  $b_{559}$  reduces molecular oxygen, which forms  $O_2^-$ . Fig. 4C and D) show that the HP form of cyt

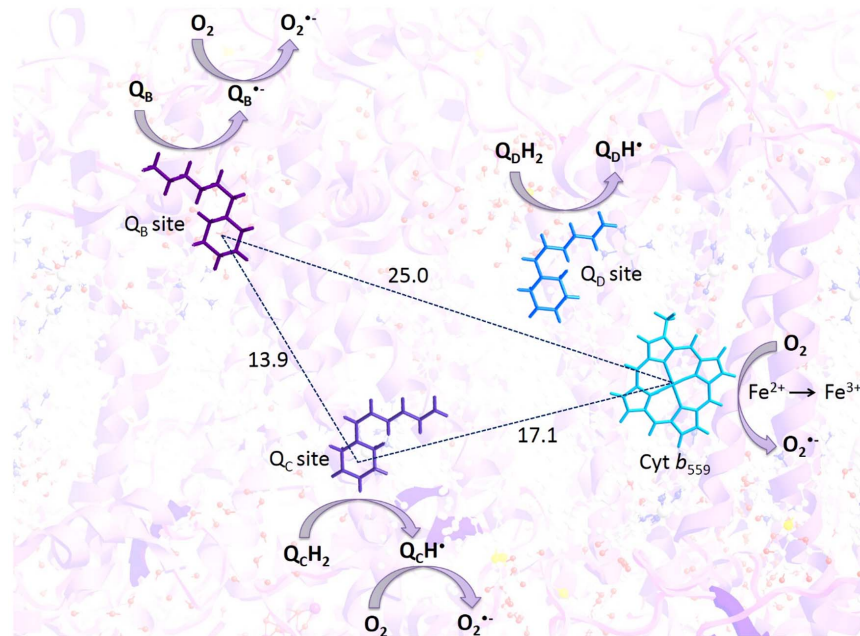

**Fig. 5. Proposed mechanism for the involvement of loosely bound plastosemiquinone at the  $Q_B$  and  $Q_C$  sites in  $O_2^{\cdot -}$  formation in PSII.** Superoxide anion radicals are produced via one-electron reduction of molecular oxygen by plastosemiquinones, which are formed via one-electron reduction of plastoquinone at the  $Q_B$  sites and one-electron oxidation of plastoquinol at the  $Q_C$  site but unlikely at the  $Q_D$  site.

doi:10.1371/journal.pone.0115466.g005

$b_{559}$  was converted to the LP form in the presence of dinoseb, as previously demonstrated by Kaminskaya and Shuvalov [15]. In addition to binding of dinoseb to  $Q_D$  site which has been claimed in the recent past, it is also known to bind to  $Q_B$  site. In such a case, the formation of  $Q_C\text{H}$  is unlikely formed by oxidation of  $Q_C\text{H}_2$ ; however, the alternative reaction pathway for formation of  $Q_C\text{H}$  occurs. Consistent with this proposal, the formation of  $Q_C\text{H}$  by one-electron reduction of plastoquinone cannot be excluded [26] and thus the involvement of  $Q_C\text{H}$  and LP form of  $cyt\ b_{559}$  in  $O_2^{\cdot -}$  formation via the  $Q_C$  site might be considered.

### 3. Involvement of the $Q_D$ site in $O_2^{\cdot -}$ production

The observation that the phenolic-type herbicide dinoseb, which binds at the  $Q_D$  site enhanced EMPO-OOH adduct EPR signal further indicates that  $Q_D\text{H}$  formed by plastoquinol oxidation at the  $Q_D$  site is not involved in  $O_2^{\cdot -}$  production (Fig. 2A).  $Q_D\text{H}_2$  oxidation by the heme iron of the HP form of  $cyt\ b_{559}$  and deprotonation by proximal amino acids results in the formation of  $Q_D\text{H}$ . Kaminskaya and Shuvalov [15] recently suggested that  $Q_D\text{H}$  is stable at the  $Q_D$  site, and the midpoint redox potentials of the  $Q_D/Q_D\text{H}$  redox couple are more positive than those of the  $Q_B/Q_B^-$  redox couple ( $E_m = -45\text{ mV}$ , pH 7). Consistent with this proposal, we assume that the reduction of molecular oxygen by  $Q_D\text{H}$  is not feasible and thus  $O_2^{\cdot -}$  formation at the  $Q_D$  site is ambiguous.

## Conclusion

The data presented in this study demonstrate that loosely bound plastosemiquinones at the  $Q_B$  and  $Q_C$  sites are involved in the formation of  $O_2^-$  via one-electron reduction of molecular oxygen. Loosely bound plastosemiquinone  $Q_B^-$  is formed via one-electron reduction of plastoquinone at the  $Q_B$  site; however, one-electron oxidation of plastoquinol by *cyt  $b_{559}$*  at the  $Q_C$  site forms  $Q_CH$ . By contrast, the results indicated that  $O_2^-$  formation from plastosemiquinones at the  $Q_D$  site was ambiguous. In addition to loosely bound plastosemiquinone, previous studies have reported the formation of  $O_2^-$  by free plastosemiquinone in the PQ pool [25, 43–45]. The interaction of plastoquinol with plastoquinone in the PQ pool was suggested to result in the formation of free  $PQ^-$ , which reduces molecular oxygen to form  $O_2^-$ . Further studies are needed to elucidate a unifying mechanism for  $O_2^-$  formation which involves PQ pool.

## Acknowledgments

We are grateful to Dr. Jan Hrbáč for his support with respect to the EPR measurements.

## Author Contributions

Conceived and designed the experiments: DKY PP. Performed the experiments: DKY AP. Analyzed the data: DKY AP. Contributed reagents/materials/analysis tools: PP. Wrote the paper: DKY PP AP JK.

## References

1. Ferreira KN, Iverson TM, Maghlaoui K, Barber J, Iwata S (2004) Architecture of the photosynthetic oxygen-evolving center. *Science* 303: 1831–1838.
2. Guskov A, Kern J, Gabdulkhakov A, Broser M, Zouni A, et al. (2009) Cynobacterial photosystem II at 2.9 Å resolution and the role of quinones, lipids, channels and chloride. *Nat Struct Mol Biol* 16: 334–342.
3. Umena Y, Kawakami K, Shen J-R, Kamiya N (2011) Crystal structure of oxygen-evolving photosystem II at a resolution of 1.9 Å. *Nature* 473: 55–61.
4. Renger G, Holzwarth AR (2005) Primary electron transfer in the RC II. In: Wydrzynski TJ, Satoh K, (eds.), *Photosystem II: the light-driven water: plastoquinoneoxidoreductase*, Springer, Dordrecht, , 139–175.
5. Rappaport F, Diner BA (2008) Primary photochemistry and energetics leading to the oxidation of the  $(Mn)_4Ca$  cluster and to the evolution of molecular oxygen in photosystem II. *Coord Chem Rev* 252: 259–272.
6. Brudvig GW (2008) Water oxidation chemistry of photosystem II. *Phil Trans R Soc B* 363: 1211–1219.
7. Cardona T, Sedoud A, Cox N, Rutherford AW (2012) Charge separation in photosystem II: a comparative and evolutionary overview. *Biochim Biophys Acta* 1817: 26–43.
8. Grundmeier A, Dau H (2012) Structural models of the manganese complex of photosystem II and mechanistic implications. *Biochim Biophys Acta* 1817: 88–105.
9. Müh F, Glöckner C, Hellmich J, Zouni A (2012) Light-induced quinone reduction in photosystem II. *Biochim Biophys Acta* 1817: 44–65.

10. **Kruk J, Strzalka K** (2001) Redox changes of cytochrome *b*<sub>559</sub> in the presence of plastoquinones. *J Biol Chem* 276: 86–91.
11. **Kaminskaya O, Shuvalov VA, Renger G** (2007) Two reaction pathways for transformation of high potential cytochrome *b*<sub>559</sub> of PSII into the intermediate potential form. *Biochim Biophys Acta* 1767: 550–558.
12. **Kaminskaya O, Shuvalov VA, Renger G** (2007) Evidence for a novel quinone-binding site in the photosystem II (PSII) complex that regulates the redox potential of cytochrome *b*<sub>559</sub>. *Biochemistry* 46: 1091–1105.
13. **Hasegawa K, Noguchi T** (2014) Molecular interaction of the quinone electron acceptor Q<sub>A</sub>, Q<sub>B</sub> and Q<sub>C</sub> in photosystem II as studied by the fragment molecular orbital method. *Photosynth Res* 120: 113–123.
14. **Lambrevia MD, Russo D, Polticelli F, Viviana S, Antonacci A, et al.** (2014) Structure/Function/Dynamics of photosystem II plastoquinone binding sites. *Curr Protein Pep Sci* 15: 285–295.
15. **Kaminskaya O, Shuvalov VA** (2013) Biphasic reduction of cytochrome *b*<sub>559</sub> by plastoquinol in photosystem II membrane fragments: Evidence of two types of cytochrome *b*<sub>559</sub>/plastoquinol redox equilibria. *Biochim Biophys Acta* 1827: 471–483.
16. **Pospíšil P** (2009) Production of reactive oxygen species by photosystem II. *Biochim Biophys Acta* 1787: 1151–1160.
17. **Pospíšil P** (2012) Molecular mechanism of production and scavenging of reactive oxygen species by photosystem II. *Biochim Biophys Acta* 1817: 218–231.
18. **Vass I** (2012) Molecular mechanism of Photodamage in the photosystem II complex. *Biochim Biophys Acta* 1817: 209–217.
19. **Frankel LK, Sallans L, Limbach PA, Bricker TM** (2012) Identification of oxidized amino acid residues in the vicinity of the Mn<sub>4</sub>CaO<sub>5</sub> cluster of photosystem II: Implications for the identification of oxygen channels within the photosystem II. *Biochemistry* 51: 6371–6377.
20. **Pospíšil P, Arató A, Krieger-Liszkay A, Rutherford AW** (2004) Hydroxyl radical generation by photosystem II. *Biochemistry* 43: 6783–6792.
21. **Tiwari A, Pospíšil P** (2009) Superoxide oxidase and reductase activity of cytochrome *b*<sub>559</sub> in photosystem II. *Biochim Biophys Acta* 1787: 985–994.
22. **Ananyev G, Renger G, Wacker U, Klimov V** (1994) The photoproduction of superoxide radicals and the superoxide dismutase activity of photosystem II: The possible involvement of cytochrome *b*<sub>559</sub>. *Photosynth Res* 41: 327–338.
23. **Cleland RE, Grace SC** (1999) Voltametric detection of superoxide production by photosystem II. *FEBS Lett* 457: 348–352.
24. **Zhang S, Weng J, Tu T, Yao S, Xu C** (2003) Study on the photo-generation of superoxide radicals in photosystem II with EPR spin trapping techniques. *Photosynth Res* 75: 41–48.
25. **Mubarakshina MM, Ivanov BN** (2010) The production and scavenging of reactive oxygen species in the plastoquinone pool of chloroplast thylakoid membranes. *Physiol Plant* 140: 103–110.
26. **Pospíšil P, Šnyrychová E, Kruk J, Strzalka K, Nauš J** (2006) Evidence that cytochrome *b*<sub>559</sub> is involved in superoxide production in photosystem II: effect of synthetic short-chain plastoquinones in a cytochrome *b*<sub>559</sub> tobacco mutant. *Biochem J* 397: 321–327.
27. **Kato Y, Sugiura M, Oda A, Watanabe T** (2009) Spectroelectrochemical determination of the redox potential of pheophytin a, the primary electron acceptor in photosystem II. *Proc Natl Acad Sci* 106: 17365–17370.
28. **Klimov VV, Allakhverdiev SI, Demeter S, Krasnovsky AA** (1979) Photoreduction of pheophytin in photosystem II of chloroplasts as a function of redox potential of the medium. *Dokl Acad Nauk USSR* 249: 227–237.
29. **Shibamoto T, Kato Y, Sugiura M, Watanabe T** (2009) Redox potential of the primary plastoquinone electron acceptor QA in photosystem II from *Thermosynechococcus elongatus* determined by spectroelectrochemistry. *Biochemistry* 48: 10682–10684.
30. **Krieger A, Rutherford AW, Johnson GN** (1995) On the determination of the redox mid-point potential of the primary quinone acceptor, Q<sub>A</sub>, in photosystem II. *Biochim Biophys Acta* 1229: 193–201.



31. Hauska G, Hurt E, Gabellini N, Locku W (1983) Comparative aspects of quinol-cytochrome *c*/plastocyaninoxidor-eductase. *Biochim Biophys Acta* 726: 97–133.
32. Wood PM (1987) The two redox potential for oxygen reduction to superoxide. *Trends Biochem Sci* 12: 250–251.
33. Pospíšil P (2011) Enzymatic function of cyt b559 in photosystem II. *J Photochem Photobiol B* 104: 341–347.
34. Berthold DA, Babcock GT, Yocum CF (1981) A highly resolved oxygen evolving photosystem II preparation from spinach thylakoid membranes. *FEBS Lett* 134: 231–234.
35. Ford RC, Evans MCW (1983) Isolation of a photosystem II from higher plants with highly enriched oxygen evolution activity. *FEBS Lett* 160: 159–164.
36. Wydrzynski T, Inoue Y (1987) Modified photosystem II acceptor side properties upon replacement of the quinone at the Q<sub>B</sub> site with 2, 5-dimethyl-*p*-benzoquinone and phenyl-*p*-benzoquinone. *Biochim Biophys Acta* 893: 33–42.
37. Kruk J, Karpinski S (2006) An HPLC-based method of estimation of the total redox stat of plastoquinone in chloroplasts, the size of the photochemically active plastoquinone-pool and its redox state in thylakoids of *Arabidopsis*. *Biochim Biophys Acta* 1757: 1669–1675.
38. Zhang H, Joseph J, Vasquez-Vivar J, Karoui H, Nsanzumuhire C, et al. (2000) Detection of superoxide anion using an isotopically labeled nitron spin trap: potential biological applications. *FEBS Lett* 473: 58–62.
39. Šnyrychová E, Pospíšil P, Nauš J (2006) The effect of metal chelators on the production of hydroxyl radicals in thylakoids. *Photosynth Res* 88: 323–329.
40. Fufezan C, Rutherford AW, Krieger-Liszky A (2002) Singlet oxygen production in herbicide-treated photosystem II. *FEBS Lett* 532: 407–410.
41. Arató A, Bondarava N, Krieger-Liszky A (2004) Production of reactive oxygen species in chloride- and calcium-depleted photosystem II and their involvement in photoinhibition. *Biochim Biophys Acta* 1608: 171–180.
42. Büchel C, Barber J, Ananyev G, Eshaghi S, Watt R, et al. (1999) Photoassembly of the manganese cluster and oxygen evolution from monomeric and dimeric CP47 reaction center photosystem II complexes. *Proc Natl Acad Sci* 96: 14288–14293.
43. Khorobrykh S, Mubarakshina M, Ivanov B (2004) Photosystem I is not solely responsible for oxygen reduction in isolated thylakoids. *Biochim Biophys Acta* 1665: 164–167.
44. Mubarakshina M, Khorobrykh S, Ivanov B (2006) Oxygen reduction in chloroplast thylakoids results in production of hydrogen peroxide inside the membrane. *Biochim Biophys Acta* 1757: 1496–1503.
45. Ivanov B, Mubarakshina M, Khorobrykh S (2007) Kinetics of the plastoquinone pool oxidation following illumination. Oxygen incorporation into photosynthetic electron transport chain. *FEBS Lett* 581: 1342–1346.
46. Sinha RK, Tiwari A, Pospíšil P (2010) Water-splitting manganese complex controls light-induced redox changes of cytochrome b<sub>559</sub> in photosystem II. *J Bioenerg Biomembr* 42: 337–344.
47. Bondarava N, Gross CM, Mubarakshina M, Golecki JR, Johnson GN, et al. (2010) Putative function of cytochrome b<sub>559</sub> as a plastoquinol oxidase. *Physiol Plant* 138: 463–473.
48. Frankel LK, Sallans L, Limbach PA, Bricker TM (2013) Oxidized amino acid residues in the vicinity of Q<sub>A</sub> and Pheo<sub>D1</sub> of the photosystem II reaction center: Putative generation sites of reducing-side reactive oxygen species. *PLoS ONE* 8 e58042.
